# Supplementary material for: Understanding the Problem of Access to Public Health Insurance Schemes among Cross-Border Migrants in Thailand through Systems Thinking
Source: MDPI journal article supplement (doi:10.3390/ijerph17145113), 2020-07-15
Supplement: s1 [file s1]

## Supplementary materials

**Table S1** Characteristics of participants engaging in the 1<sup>ST</sup> and 2<sup>ND</sup> GMBs

| Meeting | Coding | Sex | Age | Career                              | Career level | Organization                                                    | Sector        | Work experience    |
|---------|--------|-----|-----|-------------------------------------|--------------|-----------------------------------------------------------------|---------------|--------------------|
| 1, 2    | SD1    | 2   | 53  | Project manager<br>Research project | senior       | National Health Security<br>Office (NHSO)                       | Health        | More than 30 years |
| 1, 2    | SD2    | 2   | 54  | Manager                             | senior       | HSRI                                                            | Health        | More than 30 years |
| 1       | SD3    | 2   | 51  | Senior researcher                   | senior       | Disease control, Ministry<br>of Public Health, Thailand         | Health        | Less than 10 years |
| 1       | SD4    | 2   | 54  | Senior nurse                        | senior       | Department of Health,<br>Ministry of Public Health,<br>Thailand | Health        | More than 30 years |
| 1       | SD5    | 1   | 54  | Project manager<br>Project          | senior       | NGO A                                                           | Civil society | More than 30 years |
| 1, 2    | SD6    | 1   | 43  | coordinator                         | coordinator  | NGO B                                                           | Civil society | More than 30 years |
| 1       | SD7    | 1   | 31  | Lawyer                              | middle       | NGO C                                                           | Civil society | Less than 10 years |
| 1, 2    | SD8    | 2   | 29  | Volunteer                           | middle       | NGO D                                                           | Civil society | Less than 10 years |
| 1       | SD9    | 1   | 30  | Researcher                          | middle       | Ministry of Labour of<br>Thailand                               | Non-health    | Less than 10 years |

| Meeting | Coding | Sex | Age | Career                                                                         | Career level | Organization                                                                                        | Sector        | Work experience    |
|---------|--------|-----|-----|--------------------------------------------------------------------------------|--------------|-----------------------------------------------------------------------------------------------------|---------------|--------------------|
| 1       | SD10   | 2   | 34  | Researcher                                                                     | middle       | Health Intervention and Technology Assessment Program (HITAP), Ministry of Public Health, Thailand  | Health        | Less than 10 years |
| 1       | SD11   | 1   | 29  | Research assistant<br>assistant deputy director of department of finance, MOPH | coordinator  | Health Intervention and Technology Assessment Program (HITAP ), Ministry of Public Health, Thailand | Health        | Less than 10 years |
| 2       | SD12   | 1   | 42  | Research project                                                               | senior       | Ministry of Public Health of Thailand                                                               | Health        | Less than 10 years |
| 2       | SD13   | 2   | 53  | Manager                                                                        | senior       | National Health Security Office (NHSO)                                                              | Health        | More than 30 years |
| 2       | SD14   | 2   | 37  | Lecturer                                                                       | middle       | Faculty of Law, Naresuan University                                                                 | Academic      | 10-19 years        |
| 2       | SD15   | 2   | 27  | Lawyer                                                                         | middle       | Bangkok clinic, Thammasat University                                                                | Civil society | Less than 10 years |

| Meeting | Coding | Sex | Age | Career                                                                            | Career level | Organization                                    | Sector        | Work experience    |
|---------|--------|-----|-----|-----------------------------------------------------------------------------------|--------------|-------------------------------------------------|---------------|--------------------|
|         |        |     |     | Deputy director<br>of monitoring<br>and evaluation<br>centre for<br>human's right |              | National human rights<br>commission of Thailand |               |                    |
| 2       | SD16   | 2   | 59  |                                                                                   | senior       | Health Systems Research                         | Civil society | More than 30 years |
| 2       | SD17   | 2   | 37  | Researcher                                                                        | senior       | Institute (HSRI)                                | Health        | 10-19 years        |
| 1       | SD18   | 1   | 31  | Lawyer                                                                            | middle       | NGO C                                           | Civil society | Less than 10 years |
| 1       | SD19   | 2   | 29  | Volunteer                                                                         | middle       | NGO D                                           | Civil society | Less than 10 years |
| 1       | SD20   | 2   | 53  | Project manager                                                                   | senior       | National Health Security<br>Office (NHSO)       | Health        | More than 30 years |

Note: sex 1= Male, 2 = Female
